# Supplementary material for: A nigro–subthalamo–parabrachial pathway modulates pain-like behaviors
Source: PubMed Central journal article supplement (PMC9755217; doi:10.1038/s41467-022-35474-0), 2022-12-15
Supplement: 41467_2022_35474_MOESM1_ESM.pdf [file 41467_2022_35474_MOESM1_ESM.pdf]

1

## Supplementary Information

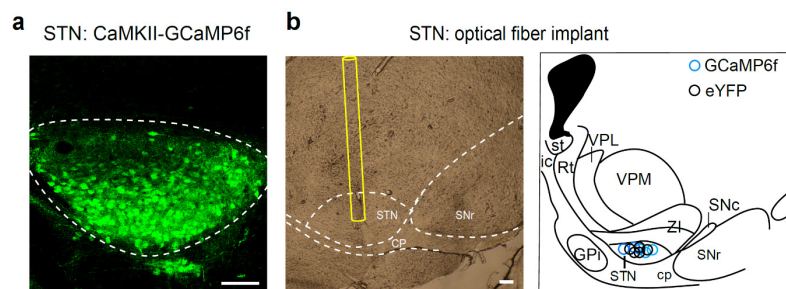

2 **Supplementary figure 1 locations of virus injections and optical fiber implants in**  
3 **the STN for GCaMP6f signal recordings. (a)** Example image of GCaMP6f  
4 expression in the STN. **(b)** Example image (left, from 5 experiments) and schematic  
5 diagram (right) of locations of optical fiber implants in the STN for GCaMP6f signal  
6 recordings. Open circles indicate the locations of optical fiber implants. Scale bar, 100  
7  $\mu\text{m}$ .

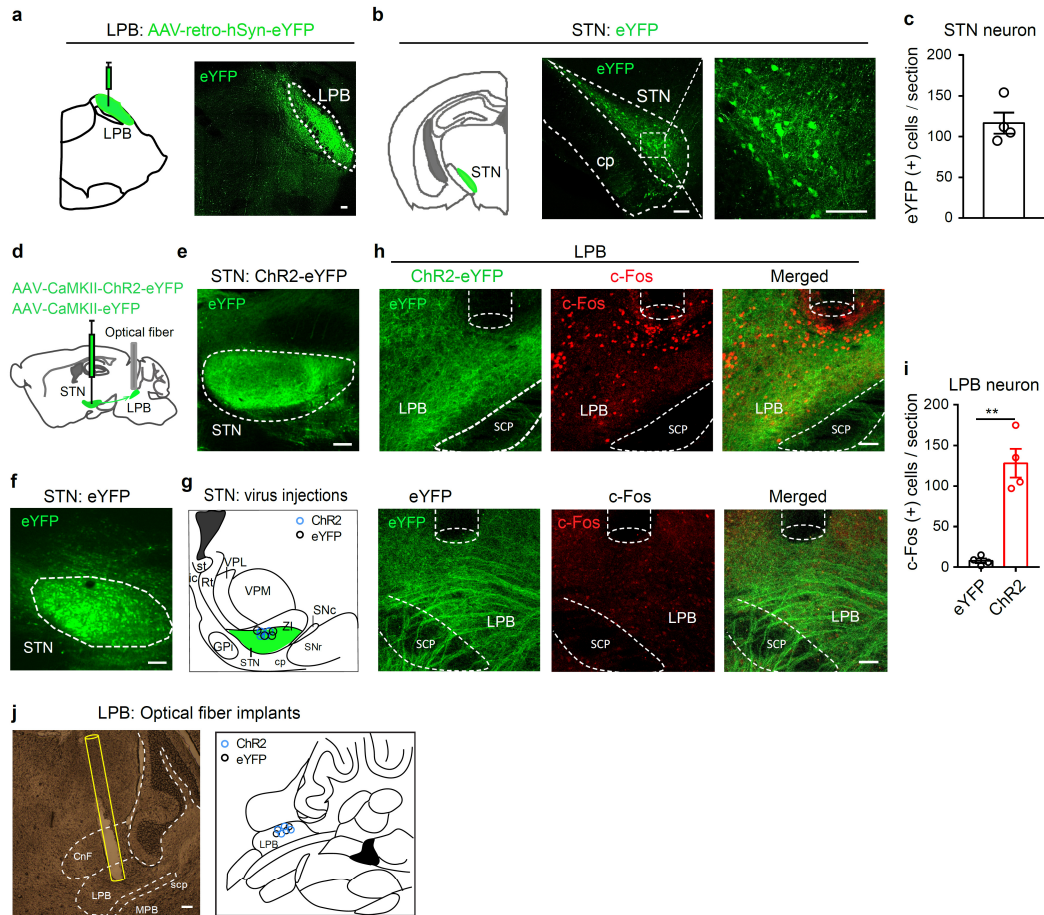

8

9 **Supplementary figure 2 Optogenetic excitation of the STN-LPB projection**

10 **increases c-Fos expression in the LPB. (a)** Schematic diagram and example image  
 11 (from 4 experiments) of retrograde virus injection in the LPB. **(b)** AAV-retro viral  
 12 expression in the STN and example image (from 4 experiments) of eYFP-labeled STN  
 13 neurons. **(c)** Bar graph showing quantification of eYFP-labeled STN neurons ( $116.5 \pm$   
 14  $12.98$  cells per section) from 4 mice. **(d)** Schematic diagram of optogenetic  
 15 manipulation of the STN-LPB projection with ChR2-eYFP or eYFP injection into the  
 16 STN and optical fiber implantation in the LPB. **(e - f)** Example images showing ChR2-  
 17 eYFP or eYFP expression in the STN. **(g)** Schematic diagram of locations of virus  
 18 injections in the STN for panels **(e - f)**. **(h)** Example images (from 4 experiments) of c-  
 19 Fos expression in the LPB after optogenetic stimulation (473 nm, 5 ms, 20 Hz, 4 mW,  
 20 2 min light with 2 min interval for 30 min) of ChR2-eYFP (upper panels) or eYFP  
 21 (lower panels) labeled STN axonal terminals in the LPB. **(i)** Bar graph showing  
 22 quantification of c-Fos (+) neurons in the LPB following blue light illumination ( $t =$

23 6.71,  $P = 0.0005$ ,  $n = 4$  mice each group, 5 LPB sections from each mouse were counted  
24 and averaged). **(j)** Example image (left) and schematic diagram (right) of locations of  
25 optical fiber implants in the LPB. \*\*  $P < 0.01$ , two-tailed  $t$ -test for **(i)**. All data are  
26 presented as mean  $\pm$  SEM. all scale bars: 100  $\mu\text{m}$ .

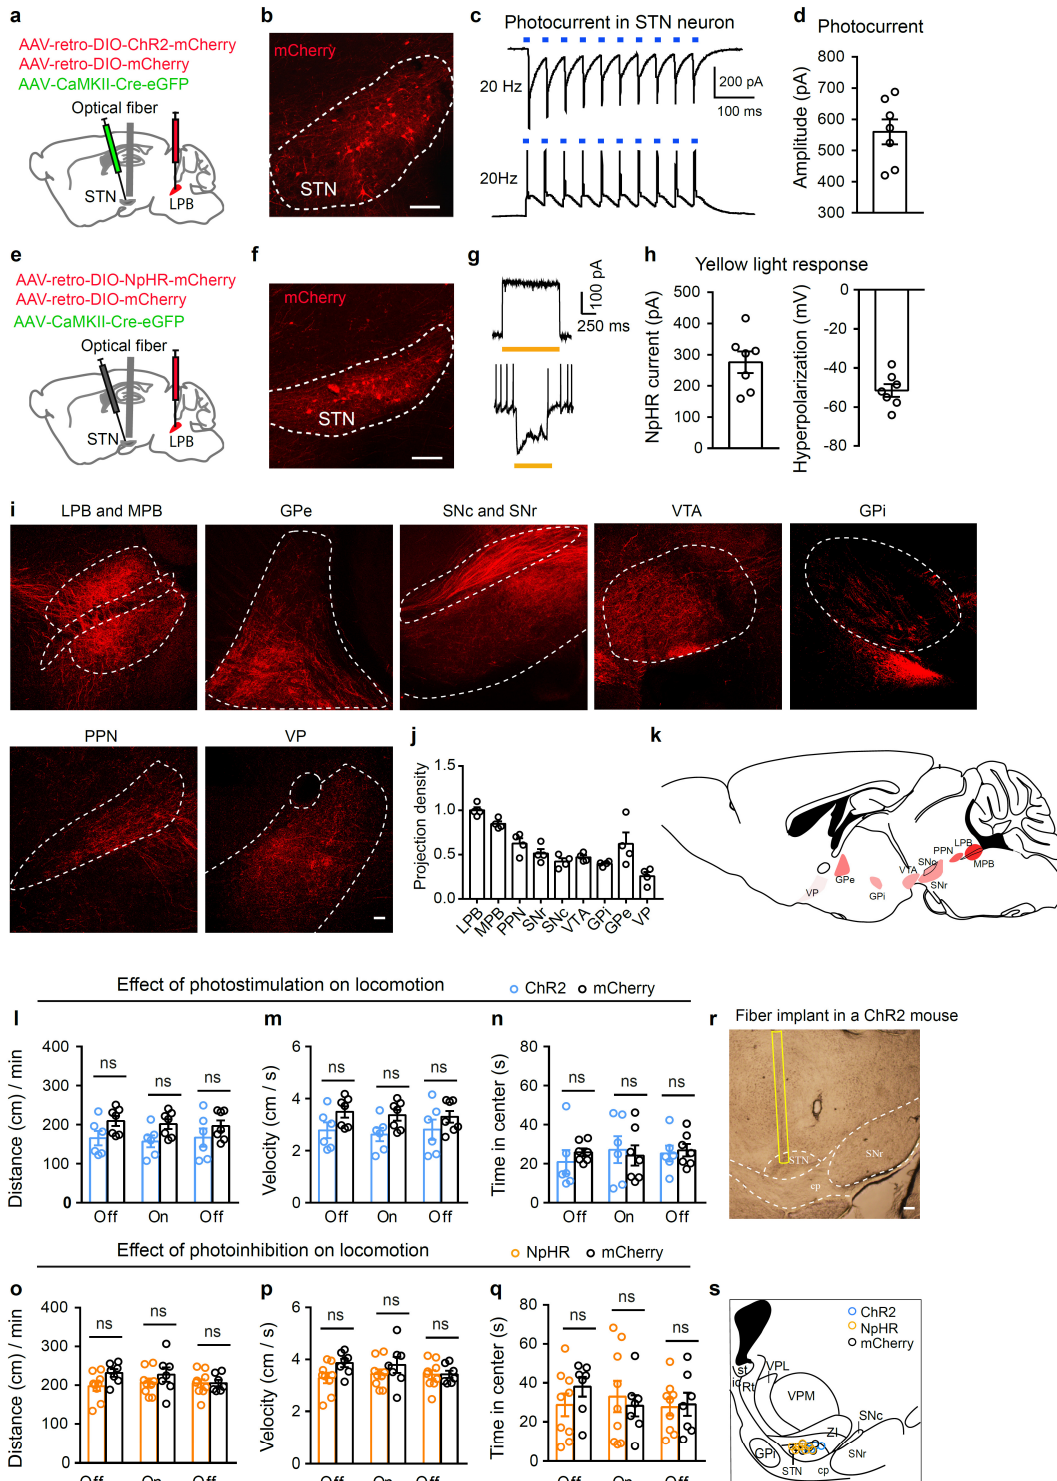

27

28 **Supplementary figure 3 Optogenetic modulation of STN-LPB neurons does not**  
 29 **affect locomotion.** (a) Diagram of virus injections and optical fiber implants for  
 30 optogenetic activation of STN-LPB neurons. (b) Example image (from 7 experiments)  
 31 of AAV-retro-DIO-ChR2-mCherry in Cre(+) STN neurons projecting to the LPB. (c -  
 32 d) Example trace (c, upper) and quantification (d) of corresponding inward currents

33 and firing (**c**, lower) recorded in an STN neuron with 20 Hz blue light stimulation.  $n =$   
34 7 cells from mice in (**d**). (**e**) Diagram of virus injections and optical fiber implants for  
35 optogenetic silencing of STN-LPB neurons. (**f**) Example image (from 7 experiments)  
36 of AAV-retro-DIO-NpHR-mCherry in Cre (+) STN neurons projecting to the LPB. (**g**  
37 - **h**) Example traces (**g**) and quantification (**h**) of the corresponding outward current (**g**,  
38 upper) and hyperpolarization of membrane potential (**g**, lower) in response to yellow  
39 light stimulation.  $n = 8$  neurons from 4 mice in (**h**). (**i - j**) Downstream nuclei of STN-  
40 LPB neurons. Target structures (**i**, from 4 experiments) and quantification (**j**) of relative  
41 fluorescence density of mCherry-labeled processes. (**k**) Mapping of major brain regions  
42 receiving axonal outputs of LPB-projecting STN neurons.  $n = 4$  mice. LPB: lateral  
43 parabrachial nucleus; MPB: medial parabrachial nucleus; PPN: pedunculopontine  
44 nucleus; SNr: substantia nigra pars reticulata; SNc: substantia nigra pars compacta;  
45 VTA: ventral tegmental area; GPi and GPe: Internal and external segments of globus  
46 pallidus; VP: ventral pallidum. (**l - q**) Effect of activation ( $n \geq 6$  per group) or inhibition  
47 ( $n \geq 9$  per group) of STN-LPB neurons on locomotion in the open field test. (**l**)  $F_{(2, 22)}$   
48  $= 0.67$ ,  $P = 0.52$ . (**m**)  $F_{(2, 22)} = 0.67$ ,  $P = 0.52$ . (**n**)  $F_{(2, 22)} = 0.33$ ,  $P = 0.72$ . (**o**)  $F_{(2, 28)} =$   
49  $3.29$ ,  $P = 0.06$ . (**p**)  $F_{(2, 28)} = 3.29$ ,  $P = 0.06$ . (**q**)  $F_{(2, 28)} = 0.84$ ,  $P = 0.44$ . (**r - s**) Example  
50 image (**r**) and diagram (**s**) of locations of optical implants in the STN. Open circles  
51 indicate locations of optical implants. Two-way ANOVA with Tukey's post-hoc  
52 analysis for (**l - q**). Data are presented as mean  $\pm$  SEM. Scale bars: 100  $\mu\text{m}$ .

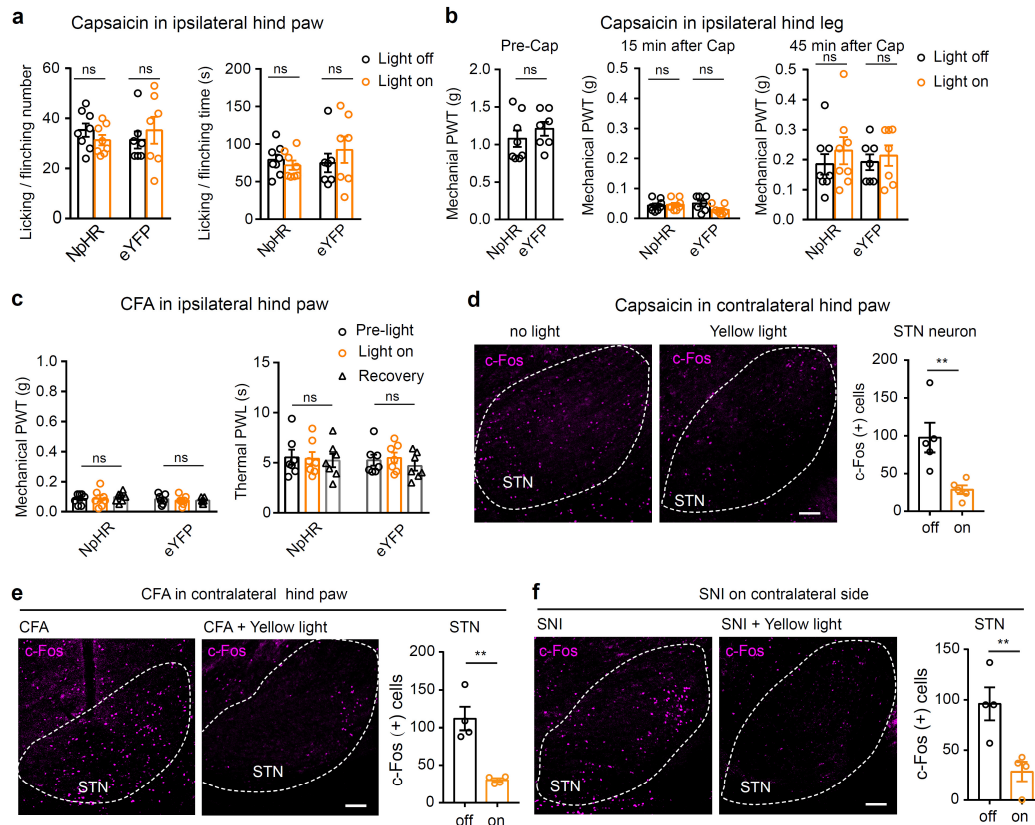

53

54 **Supplementary figure 4 Optogenetic silencing of STN-LPB neurons does not affect**  
 55 **ipsilateral pain processing but attenuates the hyperactivity of STN neurons in**  
 56 **contralateral pain states. (a)** Effect of optogenetic silencing of STN-LPB neurons on  
 57 the frequency (Left,  $F_{(1, 13)} = 1.2$ ,  $P = 0.27$ ) and duration ( $F_{(1, 13)} = 1.2$ ,  $P = 0.29$ ) of  
 58 licking / flinching behavior during a 15-min testing period after capsaicin injection into  
 59 ipsilateral hind paws.  $n \geq 7$  per group. **(b)** Effect of optogenetic silencing of STN-LPB  
 60 neurons on capsaicin-induced secondary mechanical allodynia on the ipsilateral hind  
 61 paw. Left: mechanical threshold in NpHR and eYFP mice ( $t = 0.89$ ,  $P = 0.39$ ); middle  
 62 and right: PWT tested during 15 – 30 min ( $F_{(1, 13)} = 2.6$ ,  $P = 0.13$ ) and 45 – 60 min ( $F_{(1, 13)} = 0.39$ ,  $P = 0.54$ ) after subcutaneous capsaicin injection in the ipsilateral hind leg.  $n$   
 63  $\geq 7$  per group. **(c)** Effect of optogenetic silencing of LPB-projecting STN neurons on  
 64 PWT ( $F_{(2, 24)} = 0.37$ ,  $P = 0.69$ ) and PWL ( $F_{(2, 24)} = 0.45$ ,  $P = 0.64$ ) 24 h after CFA injection  
 65 in the ipsilateral hind paws. **(d - f)** Example images (from 5 experiments in panel d,  
 66 from 4 experiments in panel e, from 4 experiments in panel f) and quantification of c-  
 67 Fos (+) neurons in the STN in the capsaicin (Cap), CFA, and SNI mice depicted in  
 68

69 Figure 4 with or without yellow-light illumination. **(d)** Right,  $t = 3.39$ ,  $P = 0.0095$ ,  $n =$   
70 5 mice. **(e)** Right,  $t = 5.16$ ,  $P = 0.002$ ,  $n = 4$  mice. **(f)** Right,  $t = 3.55$ ,  $P = 0.01$ ,  $n = 4$   
71 mice. \*\*  $P < 0.01$ ; Two-way ANOVA with Tukey's post-hoc analysis for **(a)**, **(b)**,  
72 middle and right panel) and **(c)**. Two-tailed unpaired  $t$ -test for **(b)**, left panel), **(d)**, **(e)**  
73 and **(f)**. Data are presented as mean  $\pm$  SEM. Scale bars: 100  $\mu\text{m}$ .

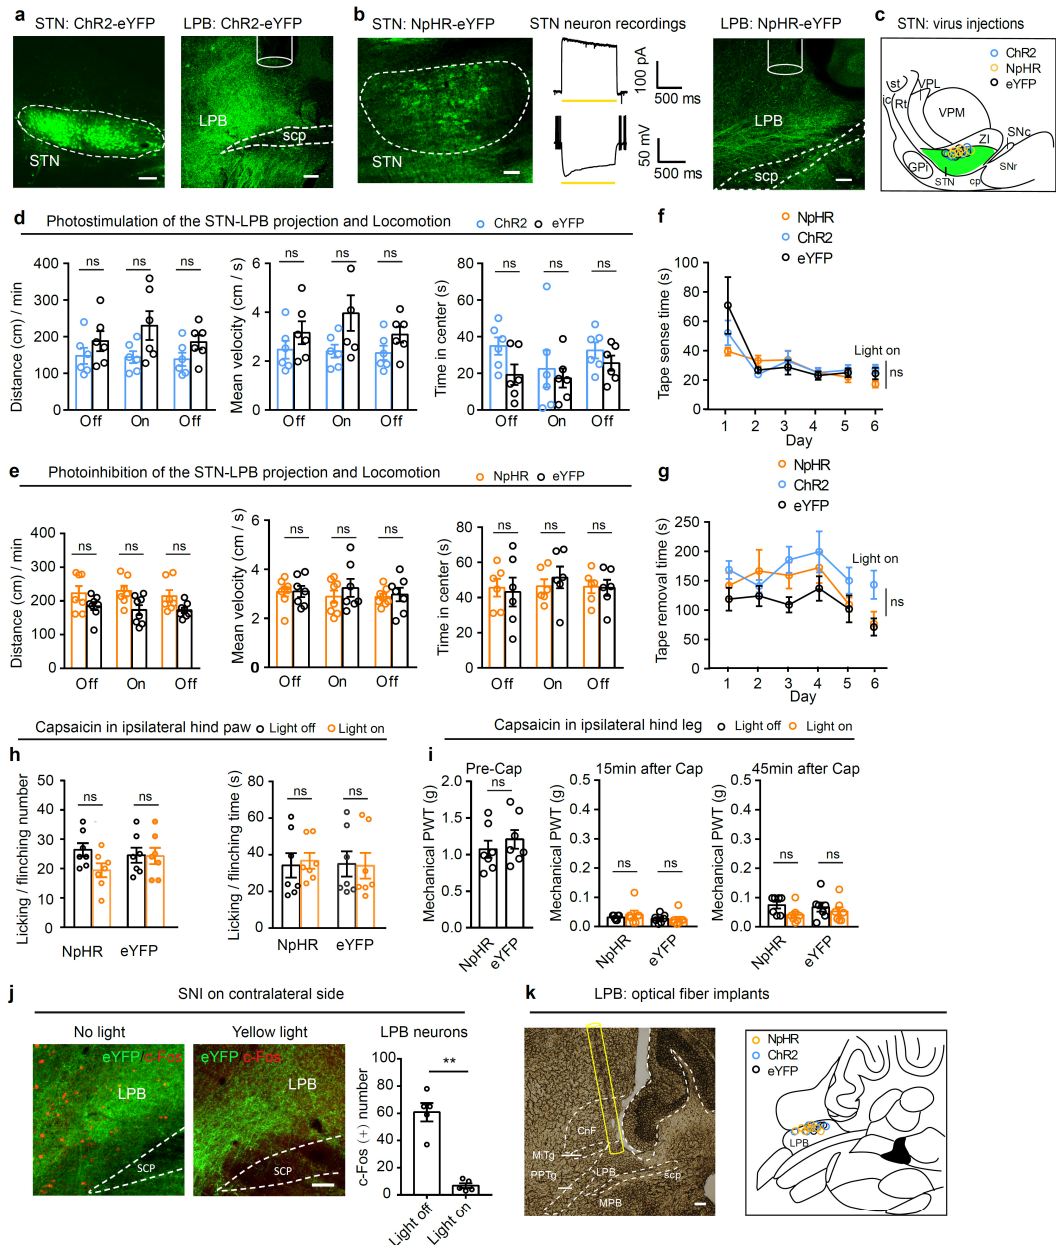

74

75 **Supplementary figure 5 Optogenetic modulation of the STN-LPB projection does**  
 76 **not affect ipsilateral pain thresholds and locomotion. (a - b)** Example images of  
 77 ChR2 (from 7 experiments) and NpHR (from 6 experiments) expression in the STN  
 78 and ChR2-labeled terminals in the LPB. **(b)** Middle: yellow-light-evoked outward  
 79 current and hyperpolarization in an NpHR-expressing STN neuron. **(c)** Diagram  
 80 showing locations of virus injections. **(d - g)** Effect of blue or yellow light on the STN-  
 81 LPB projection on motor skills ( $n \geq 6$  per group). **(d)** Left:  $F_{(2, 22)} = 1.7$ ,  $P = 0.20$ ; Middle:  
 82  $F_{(2, 22)} = 2.0$ ,  $P = 0.16$ ; Right:  $F_{(2, 22)} = 0.54$ ,  $P = 0.59$ . **(e)** Left:  $F_{(2, 26)} = 0.46$ ,  $P = 0.64$ ;  
 83 Middle:  $F_{(2, 26)} = 0.46$ ,  $P = 0.63$ ; Right:  $F_{(2, 26)} = 0.57$ ,  $P = 0.57$ . **(f)**  $F_{(10, 105)} = 1.86$ ,  $P =$



84 0.06. **(g)**  $F_{(10, 105)} = 0.93$ ,  $P = 0.51$ . Blue bars in **(f, g)** indicate blue or yellow light to  
85 activate ChR2 or NpHR in the LPB. **(h - i)** Effect of silencing of the STN–LPB  
86 projection on capsaicin-induced nocifensive behavior and secondary mechanical  
87 hyperalgesia ( $n = 7$ ). **(h)** Left,  $F_{(1, 12)} = 3.18$ ,  $P = 0.1$ ; Right,  $F_{(1, 12)} = 0.77$ ,  $P = 0.39$ .  
88 **(i)** Left:  $t = 0.78$ ,  $P = 0.45$ ; Middle:  $F_{(1, 12)} = 0.55$ ,  $P = 0.47$ ; Right:  $F_{(1, 12)} = 0.82$ ,  $P =$   
89  $0.38$ . **(j)** Example images (from 5 experiments) and quantification of c-Fos(+) LPB  
90 neurons ( $t = 7.78$ ,  $P < 0.0001$ ;  $n = 5$ ). **(k)** Example image and diagram of locations of  
91 optical fiber implants in the LPB. \*\*  $P < 0.01$ ; Two-way ANOVA with Tukey's post-  
92 hoc analysis for **(d - h)** and **(i, middle and right panel)**; Two-tailed unpaired  $t$ -test for **(i,**  
93 **left panel)** and **(j, right panel)**. Open circles in **(c)** and **(k)** indicate locations of virus  
94 injection or optical fiber implant. Data are presented as mean  $\pm$  SEM. Scale bars: 100  
95  $\mu\text{m}$ .

96

97

98

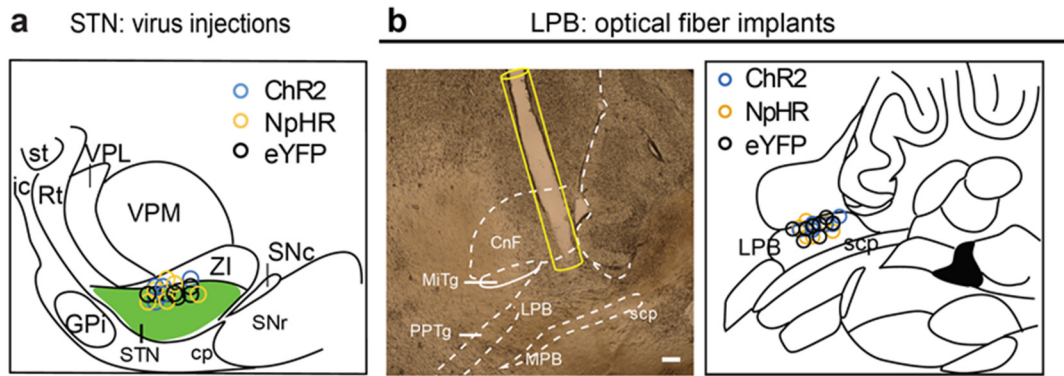

99

100 **Supplementary figure 6 Locations of virus injections and optical fiber implants in**  
 101 **female mice. (a)** Diagram showing virus injection sites in the STN. **(b)** Locations of  
 102 optical fiber implants in the LPB. Open circles in panel indicate sites of virus injections  
 103 or optical fiber implants. Scale bars: 100  $\mu$ m.

104

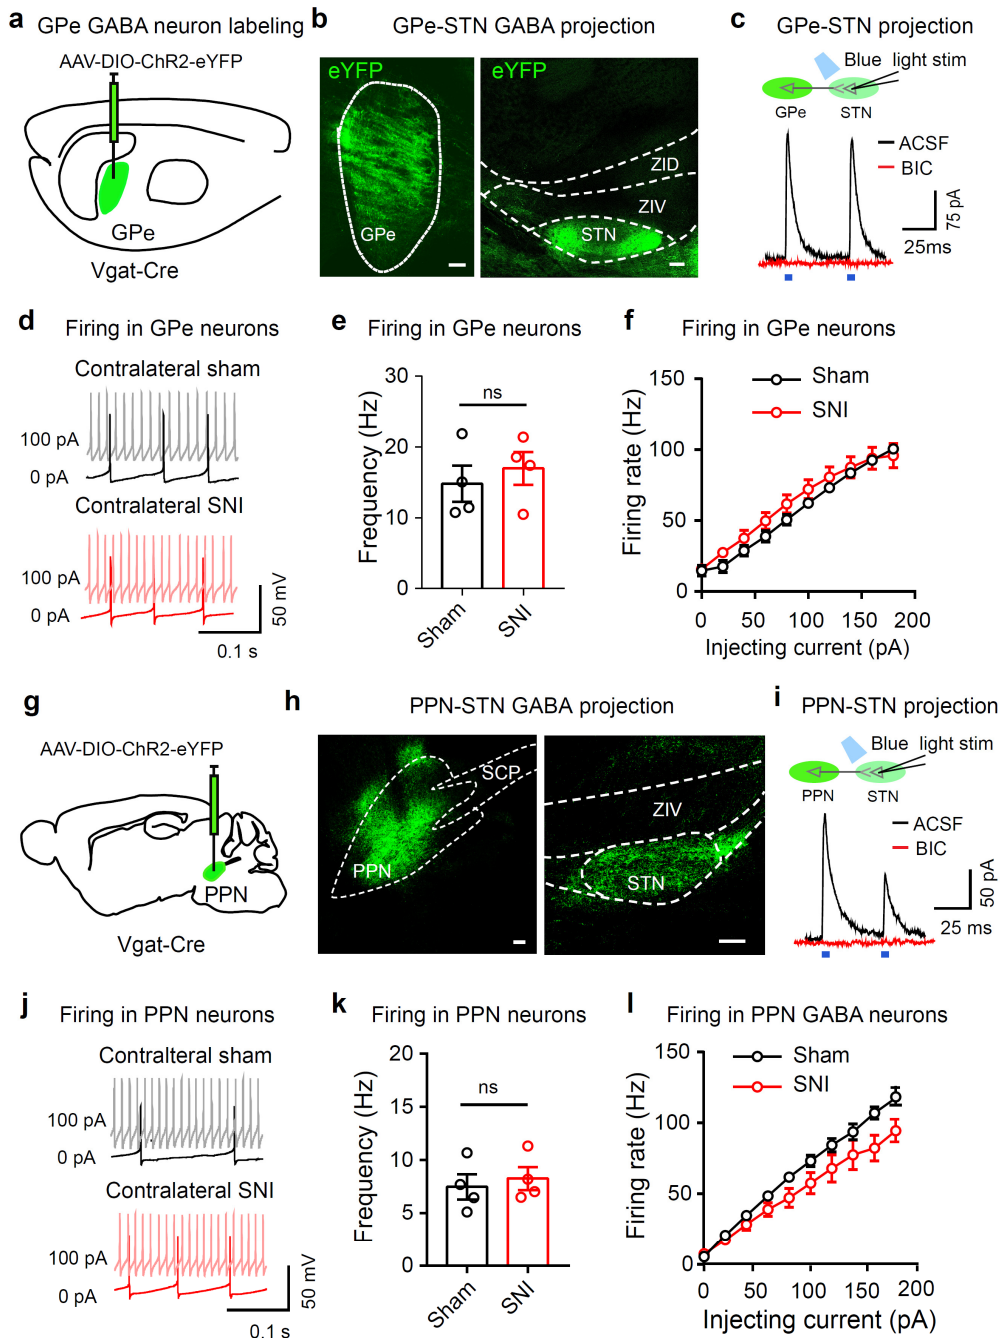

105

106 **Supplementary figure 7 SNI does not affect the excitability of GABA neurons in**

107 **the GPe and PPN. (a)** Schematic diagram of labeling of GPe<sup>GABA</sup> neurons. **(b)**

108 Example images (from 4 experiments) showing ChR2 expression in the GPe (left) and

109 ChR2-labeled terminals in the STN (right). **(c)** Whole-cell patch clamp recording of

110 blue light-evoked currents in STN neurons (top). Photo-currents in STN neurons

111 (bottom) were blocked by 10  $\mu$ M BIC. **(d)** Firing recorded from GPe<sup>GABA</sup> neurons of

112 sham and SNI mice. **(e - f)** Summary of spontaneous **(e)** and evoked **(f)** firing recorded

113 from Chr2-labeled GPe<sup>GABA</sup> neurons in sham and SNI mice. **(e)**  $t = 0.63$ ,  $P = 0.55$ ,  $n =$   
114 4 per group. **(f)**  $F_{(9, 99)} = 0.57$ ,  $P = 0.82$ ;  $n = 3$  mice per group. **(g)** Schematic diagram of  
115 labeling of PPN<sup>GABA</sup> neurons. **(h)** Example images (from 4 experiments) showing  
116 expression of Chr2 in the PPN (left) and Chr2-labeled terminals in the STN (right).  
117 **(i)** Whole-cell patch-clamp recording of blue-light-evoked currents in STN neurons.  
118 Blue-light-evoked currents were BIC-sensitive (bottom). **(j)** Firing recorded from  
119 PPN<sup>GABA</sup> neurons from sham and SNI mice. **(k - l)** Summary of spontaneous **(k)** and  
120 evoked **(l)** firing recorded from PPN<sup>GABA</sup> neurons in sham and SNI mice. **(k)**  $t = 0.48$ ,  
121  $P = 0.65$ ,  $n = 4$  mice per group. **(l)**  $F_{(9, 80)} = 1.03$ ,  $P = 0.42$ ;  $n = 3$  mice per group. Two-  
122 tailed  $t$ -test for **(e)** and **(k)**; Two-way ANOVA with Turkey's post-hoc analysis for **(f)**  
123 and **(l)**. Data are presented as mean  $\pm$  SEM. Scale bars: 100  $\mu$ m.

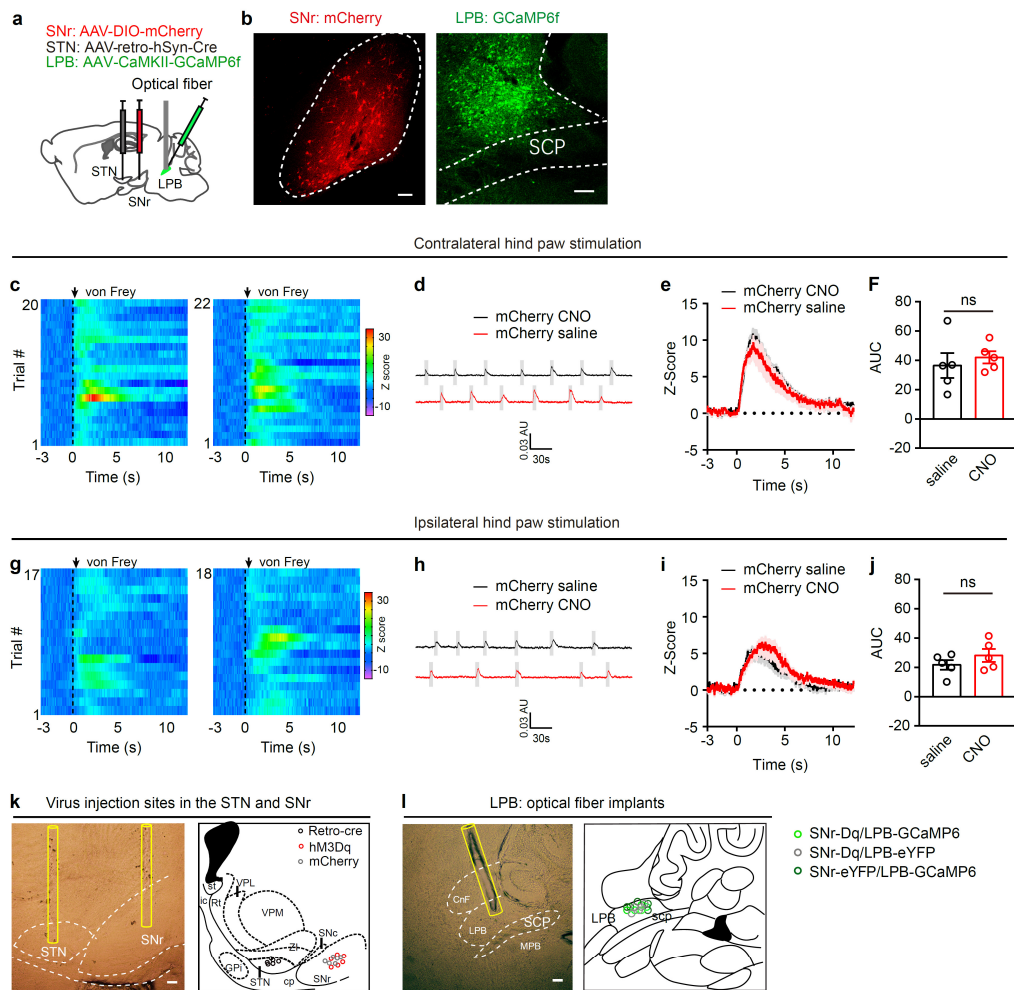

124

125 **Supplementary figure 8 Connectivity of the SNr<sup>GABA</sup>-STN<sup>Glu</sup>-LPB<sup>Glu</sup> pathway. (a)**

126 Schematic diagram for measuring the response of LPB<sup>Glu</sup> neurons to mechanical

127 stimulation with saline or CNO administration. (b) Example images (from 5

128 experiments) showing mCherry-labeled SNr neurons and GCaMP6f expressing LPB

129 neurons. (c - j) GCaMP6f signal was recorded with fiber photometry before, during,

130 and after von Frey fiber (4 g) stimulation on hind paws. CNO (i.p., 3 mg/kg) or saline

131 (i.p.) was applied 45 min prior to GCaMP6f signal recording. Heat maps (c and g),

132 example traces (d and h), average traces (e and i), and quantification (f and j, AUC in

133 panels e and i) of GCaMP6f response in the LPB of mice receiving von Frey stimulation

134 of the contralateral or ipsilateral hind paw after saline or CNO administration. (f) t =

135 0.93, P = 0.4. (j) t = 0.98, P = 0.38; Two-tailed paired t test; n = 5 mice. (k - l) Example

136 images (left) and diagrams (right) of locations of virus injection and optical fiber

137 implants (Open circles indicate injection sites or the locations of optical fiber implants).

138 AU in panels **(d)** and **(h)** stands for arbitrary unit of fluorescence intensity. Data are  
139 presented as mean  $\pm$  SEM. Scale bars: 100  $\mu$ m.

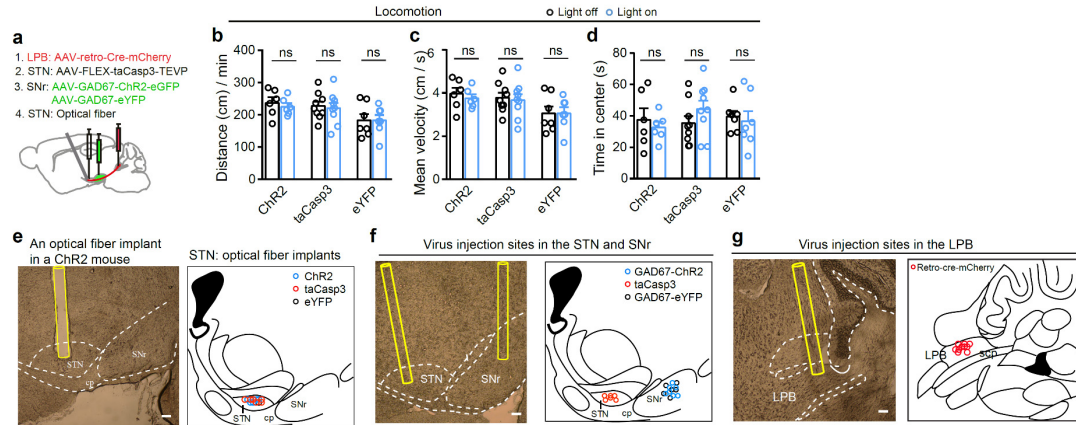

140 **Supplementary figure 9 Optogenetic activation of the SNr<sup>GABA</sup>-STN<sup>Glu</sup>-LPB<sup>Glu</sup>**  
 141 **pathway does not change locomotion in physiological condition. (a)** Schematic  
 142 diagram for taCasp3-mediated ablation of STN-LPB neurons and optogenetic  
 143 activation of axonal terminals of SNr GABA neurons in the STN. **(b - d)** Effect of  
 144 disruption of the SNr-STN-LPB pathway on locomotion in the open field test. **(b)**  $F_{(2, 39)} = 0.51$ ,  $P = 0.6$ . **(c)**  $F_{(2, 39)} = 0.51$ ,  $P = 0.6$ . **(d)**  $F_{(2, 39)} = 1.05$ ,  $P = 0.41$ . **(e)** Example  
 146 image (left) and diagram (right) of locations of optical fiber implants in the STN (Open  
 147 circles indicate the locations of optical fiber implants). **(f - g)** Example images (left)  
 148 and diagrams (right) of locations of virus injection into the STN, SNr, and LPB (Open  
 149 circles indicate the injection sites). Two-way ANOVA with Turkey's post-hoc analysis  
 150 for **(b - d)**. Scale bars: 100  $\mu$ m. Data are presented as mean  $\pm$  SEM. ChrR2: SNr-ChR2,  
 151 STN-mCherry; taCasp3: SNr-ChR2, STN-taCasp3 lesion; eYFP: SNr-eYFP, STN-  
 152 mCherry.

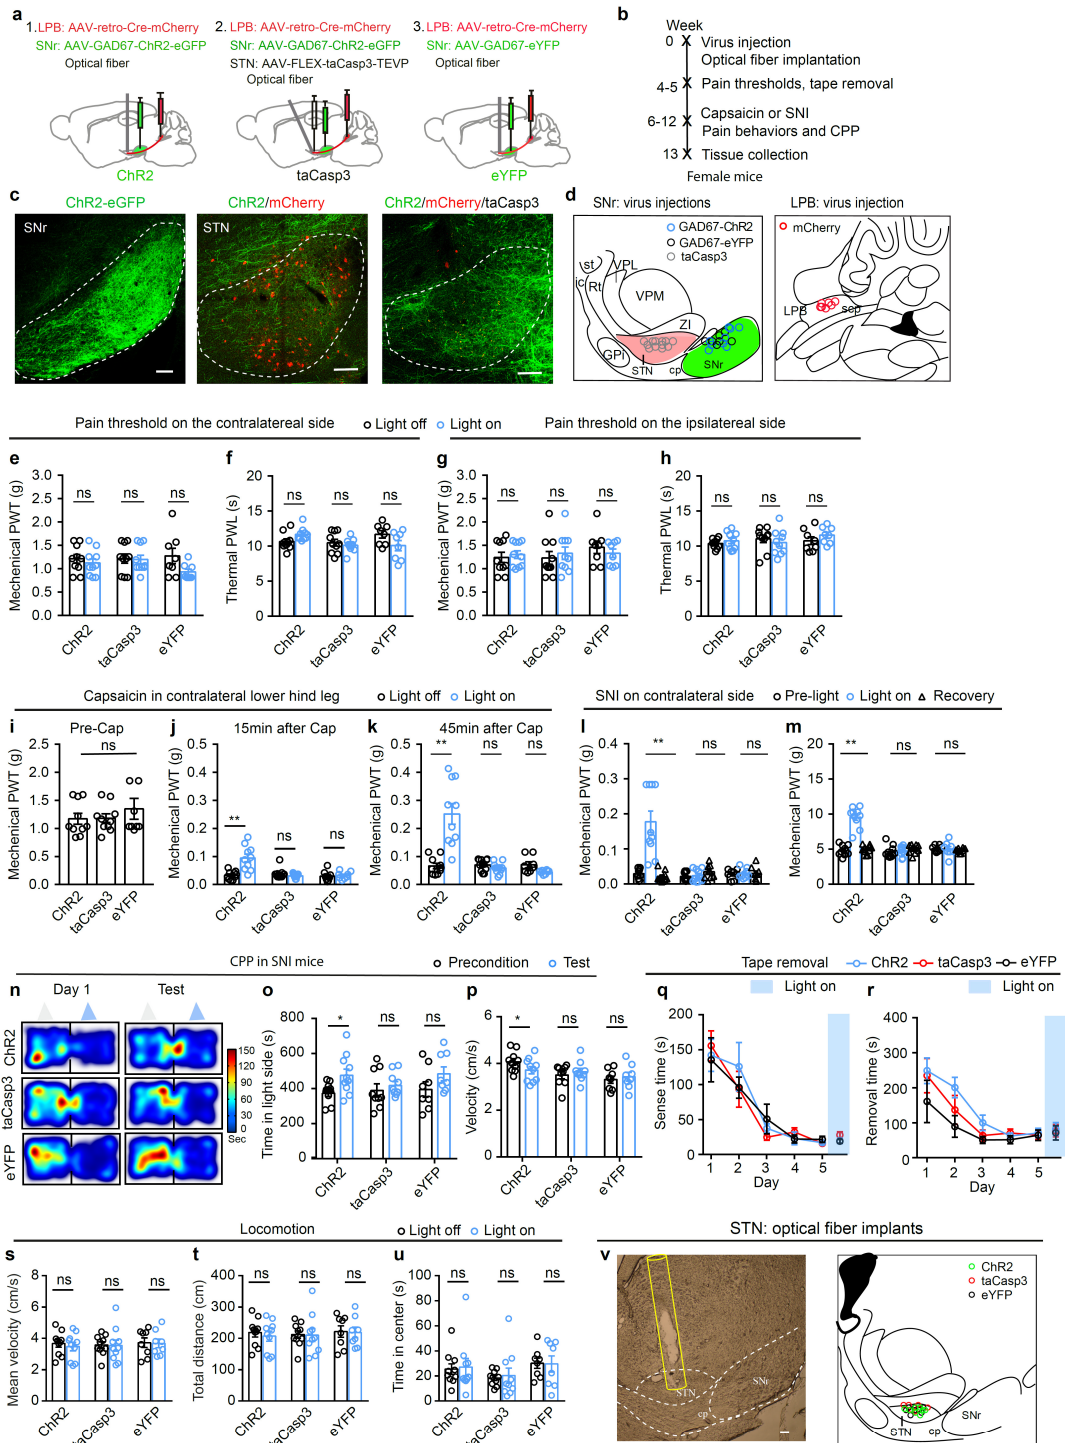

153

154 **Supplementary figure 10 The SNr<sup>GABA</sup>-STN<sup>Glu</sup>-LPB<sup>Glu</sup> pathway in pain**  
 155 **modulation in female mice. (a - b) Schematic diagram and timeline of experimental**  
 156 **setup. (c) Example images of virus expression (from 5 experiments). (d) Virus injection**  
 157 **sites in the STN, SNr and LPB. (e - h) Effect of disruption of the SNr-STN-LPB**  
 158 **pathway on PWT and PWL of the hind paws. (e)  $F_{(1, 25)} = 3.14, P = 0.088$ . (f)  $F_{(1, 25)} =$**



159 0.02,  $P = 0.9$ . **(g)**  $F_{(1, 25)} = 76$ ,  $P = 0.39$ . **(h)**  $F_{(1, 25)} = 0.5$ ,  $P = 0.48$ .  $n \geq 8$  each group. **(i -**  
160 **m)** Effect of disruption of SNr-STN-LPB pathway on pain thresholds in Cap and SNI  
161 mice. **(i)**  $F_{(2, 25)} = 0.62$ ,  $P = 0.66$ . **(j)**  $F_{(1, 26)} = 9.5$ ,  $P = 0.0048$ . **(k)**  $F_{(1, 26)} = 11.7$ ,  $P =$   
162  $0.0021$ . **(l)**  $F_{(2, 50)} = 18.29$ ,  $P < 0.0001$ . **(m)**  $F_{(2, 50)} = 44.06$ ,  $P < 0.0001$ .  $n \geq 8$  per group.  
163 **(n - p)** Representative heat maps **(n)** and time spent **(o)** and velocity **(p)** in the blue-  
164 light-paired chamber in pre-test and test session in SNI mice ( $n \geq 8$  per group). Grey  
165 and blue triangles in panel **(n)** represent no light and blue light presented in the chamber  
166 during the conditioning session, respectively. **(o)**  $F_{(1, 24)} = 9.91$ ,  $P = 0.004$ . **(p)**  $F_{(1, 24)} =$   
167  $0.15$ ,  $P = 0.71$ . **(q - u)** disruption of the SNr-STN-LPB pathway had no effect on motor  
168 skill ( $n \geq 8$  per group). **(q)**  $F_{(2, 25)} = 0.081$ ,  $P = 0.92$ ; Light off vs on:  $F_{(5, 50)} = 0.82$ ,  $P =$   
169  $0.54$ . **(r)**  $F_{(2, 25)} = 2.27$ ,  $P = 0.12$ ; Light off vs on:  $F_{(5, 50)} = 0.39$ ,  $P = 0.85$ . **(s)**  $F_{(1, 25)} =$   
170  $0.39$ ,  $P = 0.54$ . **(t)**  $F_{(1, 25)} = 0.35$ ,  $P = 0.56$ . **(u)**  $F_{(1, 25)} = 0.06$ ,  $P = 0.8$ . **(v)** Locations of  
171 optical fiber implants in the STN. Open circles in panel **(d)** and **(v)** indicate the virus  
172 injection sites and locations of optical fiber implants, respectively. \*  $P < 0.05$ , \*\*  $P <$   
173  $0.01$ ; One-way ANOVA with Tukey's post-hoc analysis for panel **(i)**; Two-way  
174 ANOVA with Tukey's post-hoc analysis for **(e - h)**, **(j - m)**, and **(o - u)**. Data are  
175 presented as mean  $\pm$  SEM. Scale bars: 100  $\mu\text{m}$ .

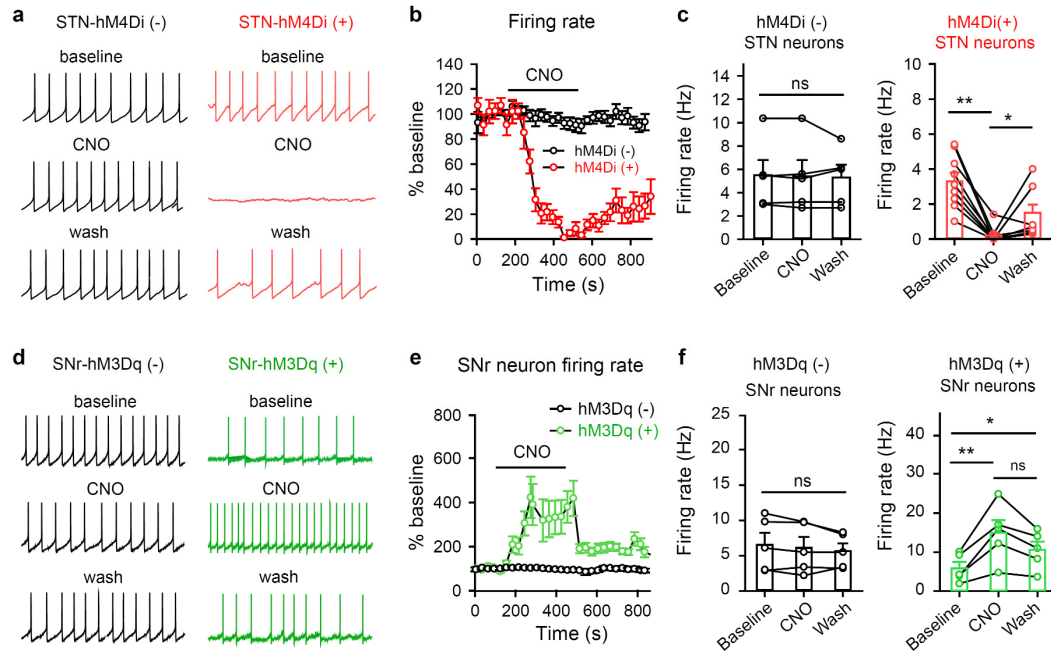

176 **Supplementary figure 11 Chemogenetic manipulation of the firing of STN and**  
 177 **SNr neurons.** Whole-cell patch-clamp recordings were performed on STN and SNr  
 178 neurons from wild type mice without viral injection (hM4Di(-) or hM3Dq(-)), on  
 179 hM4Di(+) STN neurons from mice received AAV-CaMKII-hM4Di-mCherry  
 180 injection in the STN, on hM3Dq(+) SNr neurons from Vgat-Cre mice received AAV-  
 181 EF1 $\alpha$ -DIO-hM3Dq-mCherry injection in the SNr. **(a)** Representative traces (2 s) of  
 182 firing from an STN neuron from hM4Di(-) and hM4Di(+) mice before (baseline),  
 183 during (CNO), and after (wash) bath application of 3  $\mu$ M CNO. **(b)** Time courses of  
 184 the effect of CNO on firing rate in hM4Di(-) and hM4Di(+) STN neurons. **(c)** CNO  
 185 did not affect firing rate of STN neurons from hM4Di (-) mice (Left panel:  $F = 0.08$ ,  $P$   
 186  $= 0.92$ , One way repeated measures ANOVA), but inhibited firing rate of hM4Di(+)  
 187 STN neurons (Right panel:  $F = 16.17$ ,  $P < 0.001$ , One way repeated measures  
 188 ANOVA). Data in **(b)** and **(c)** were from 5 hM4Di (-) mice and 5 hM4Di (+) mice. **(d)**  
 189 Representative traces (2 s) of firing from hM3Dq (-) and hM3Dq (+) SNr neurons  
 190 before (baseline), during (CNO), and after (wash) bath application of 3  $\mu$ M CNO. **(e)**  
 191 Time courses of the effect of CNO on firing rate of hM3Dq(-) and hM3Dq (+) STN  
 192 neurons. **(f)** CNO did not affect firing rate of STN neurons from hM3Dq (-) mice  
 193 (Left panel:  $F = 1.50$ ,  $P = 0.28$ , One way repeated measures ANOVA), but enhanced

194 firing rate of hM3Dq (+) STN neurons (Right panel:  $F = 18.51$ ,  $P < 0.001$ , One way  
195 repeated measures ANOVA). Data in **(e)** and **(f)** were from 5 WT mice and 5 hM3Dq  
196 (+) mice. Data are presented as mean  $\pm$  SEM.

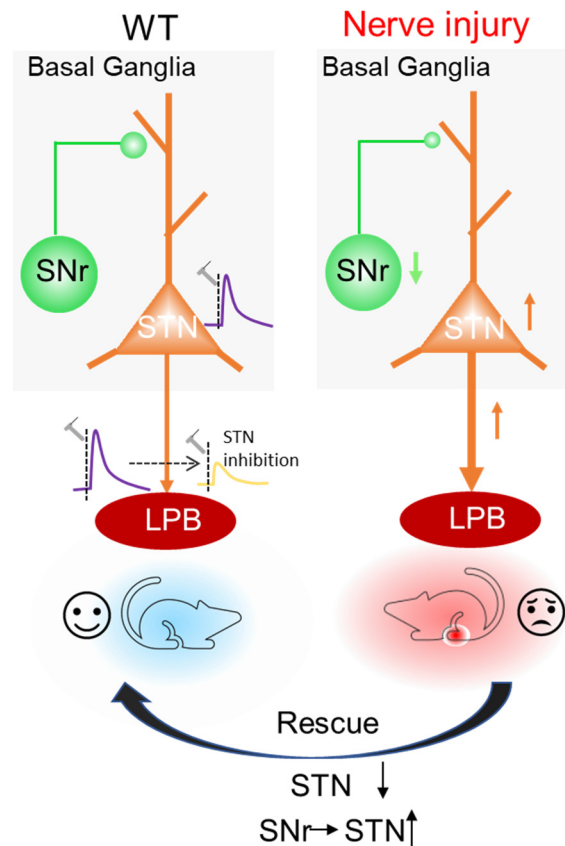

197

198 **Supplementary figure 12 Neuroplasticity in  $\text{SNr}^{\text{GABA}}\text{-STN}^{\text{Glu}}\text{-LPB}^{\text{Glu}}$  pathway**

199 **after nerve injury. Left:** In the  $\text{SNr}^{\text{GABA}}\text{-STN}^{\text{Glu}}\text{-LPB}^{\text{Glu}}$  pathway, both  $\text{STN}^{\text{Glu}}$  and

200  $\text{LPB}^{\text{Glu}}$  neurons respond to peripheral nociceptive stimulation. Inhibition of  $\text{STN}^{\text{Glu}}$

201 neurons or stimulation of  $\text{SNr}^{\text{GABA}}$  neurons attenuates nociceptive responses in LPB

202 neurons, mitigating pain-like behavior and spontaneous pain during pain states.

203 **Right:** After peripheral nerve injury,  $\text{SNr}^{\text{GABA}}$  neurons become hypoactive, but  $\text{STN}^{\text{Glu}}$

204 and  $\text{LPB}^{\text{Glu}}$  neurons are hyperactive and the  $\text{STN}^{\text{Glu}}\text{-LPB}^{\text{Glu}}$  projection is strengthened.

205 These long-term alterations may be related to hypersensitivity to nociceptive stimuli.

206 Reversing the dysfunction in the SNr-STN-LPB pathway by either optogenetic

207 inhibition of STN neurons or optogenetic activation of SNr-STN GABAergic

208 projection partially relieves hypersensitivity to nociceptive stimuli and aversion.

209 Supplementary Table 1: The resting membrane potential (Rm) and input resistance (Ir) of STN glutamatergic neurons and LPB  
 210 glutamatergic neurons recorded in sham and SNI mice

|      | STN glutamatergic neurons |                   | LPB glutamatergic neurons |                   |
|------|---------------------------|-------------------|---------------------------|-------------------|
|      | Rm                        | Ir                | Rm                        | Ir                |
| Sham | -50.2 ± 1.1, n=5          | 979.1 ± 48.1, n=5 | -50.9 ± 1.2, n=9          | 932.7 ± 67.8, n=9 |
| SNI  | -49.1 ± 1.0, n=5          | 1054 ± 50.6, n=5  | -48.8 ± 1.1, n=9          | 830.8 ± 72.4, n=9 |

211 n represents the number of animals.

212 Supplementary Table 2: The resting membrane potential (Rm) and input resistance (Ir) in neurons recorded in sham and SNI mice

|      | SNr GABA neurons |                   | GPe GABA neurons |                   | PPN GABA neurons |                   |
|------|------------------|-------------------|------------------|-------------------|------------------|-------------------|
|      | Rm               | Ir                | Rm               | Ir                | Rm               | Ir                |
| Sham | -50.4 ± 0.8, n=6 | 606.4 ± 47.8, n=6 | -48.4 ± 1.4, n=4 | 647.3 ± 72.6, n=4 | -49 ± 1.2, n=4   | 912 ± 84.4, n=4   |
| SNI  | -50.7 ± 0.8, n=6 | 769.5 ± 72.9, n=6 | -50.7 ± 1.7, n=4 | 853.7 ± 90.6, n=4 | -45.9 ± 1.4, n=4 | 868.9 ± 94.2, n=4 |

213 n represents the number of animals.
